# Supplementary material for: Follistatin-like 1 deficiency impairs T cell development to promote lung metastasis of triple negative breast cancer
Source: publisher site journal article supplement (doi:10.18632/aging.202579), 2021-02-26
Supplement: Supplementary file [file aging-v13i5-202579-supplementary-material-SD1.pdf]

SUPPLEMENTARY FIGURES

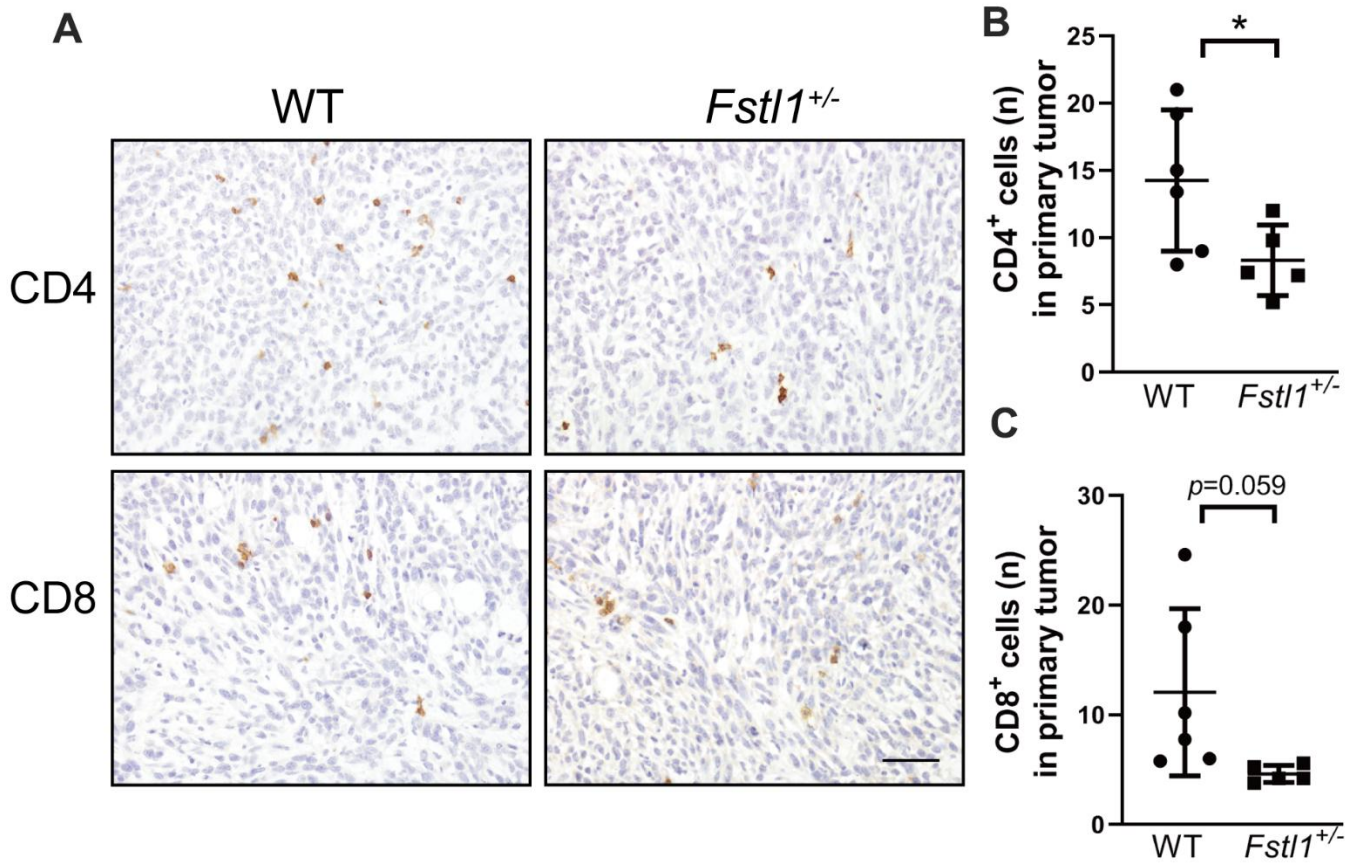

**Supplementary Figure 1. *Fstl1*<sup>+/-</sup> mice exhibited significant reduction in CD4<sup>+</sup> T cells in the primary tumor.** (A) Representative IHC staining of CD4 and CD8 T cells in primary tumor from WT and *Fstl1*<sup>+/-</sup> mice. Scale bar, 40 μm. (B) The numbers of CD4 positive cells in the primary tumor (n=6, WT; n=5, *Fstl1*<sup>+/-</sup>). (C) The numbers of CD8 positive cells in the primary tumor (n=6, WT; n=5, *Fstl1*<sup>+/-</sup>). Data are presented as mean ± SD. Each dot in the graphs represents an individual mouse. \**p* < 0.05.

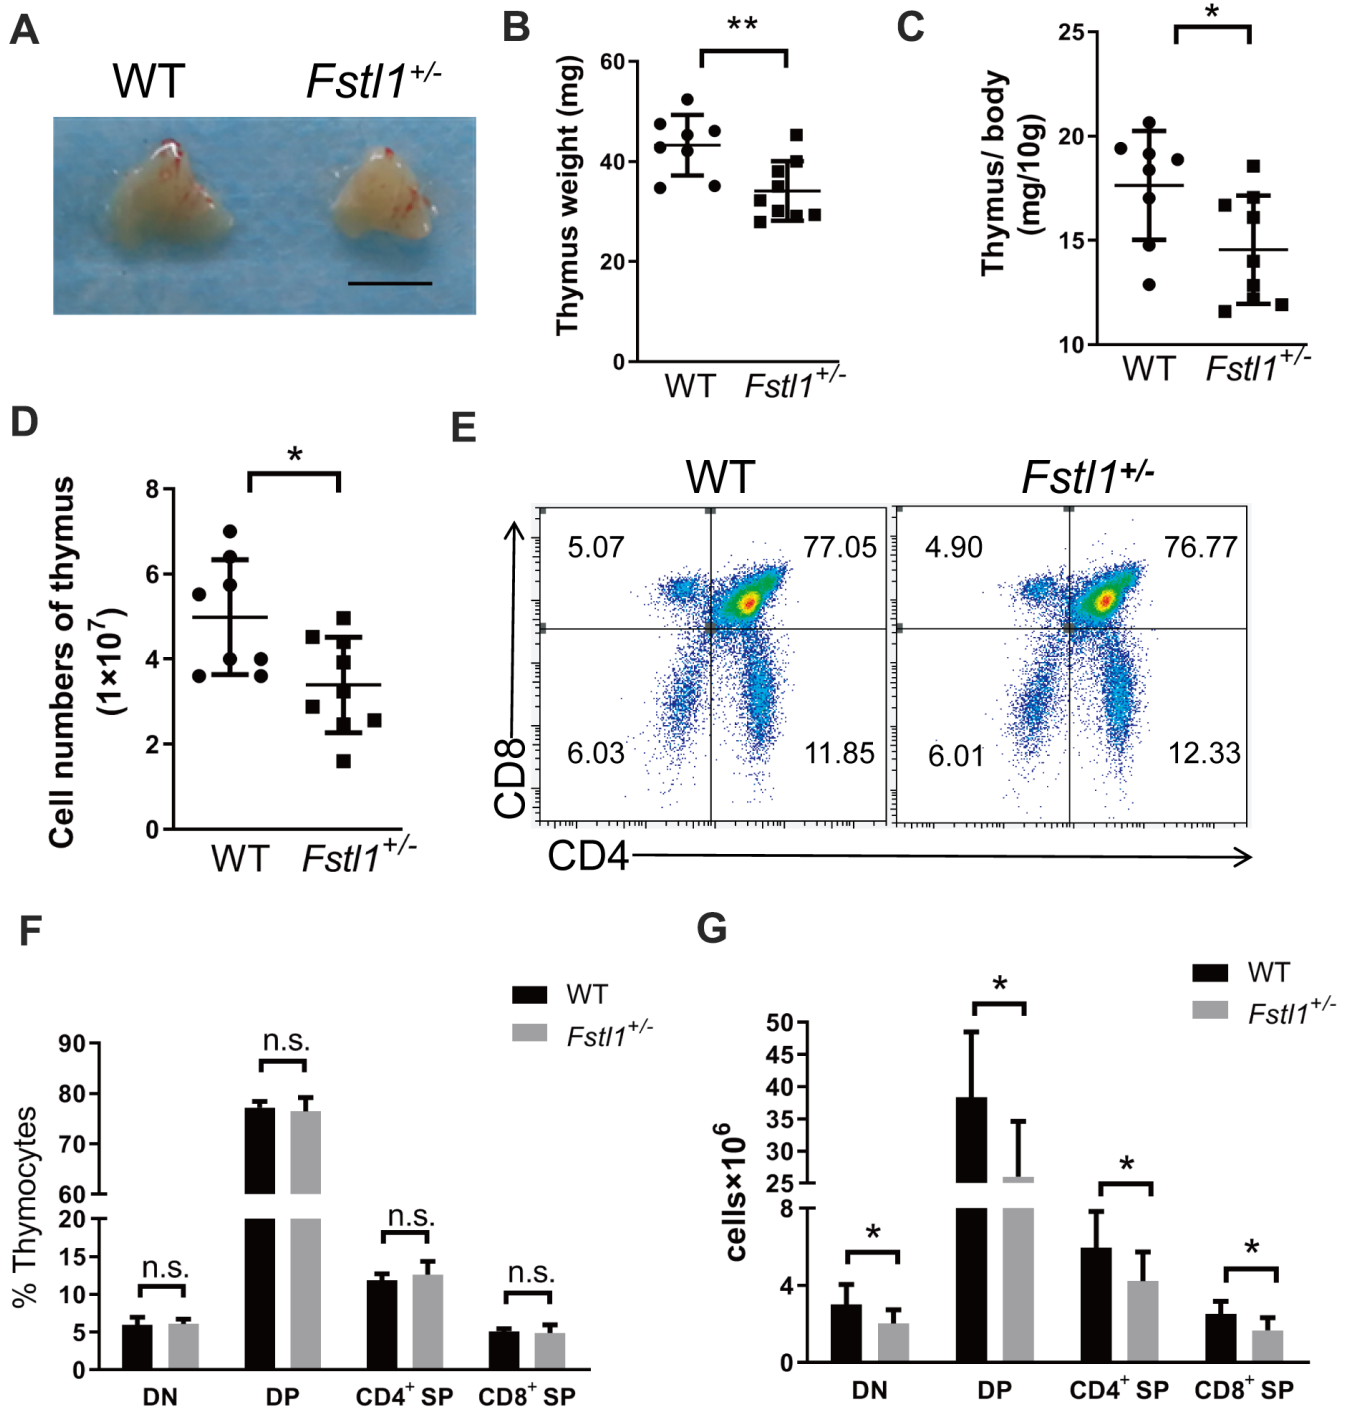

**Supplementary Figure 2. *Fstl1*<sup>+/-</sup> tumor-bearing mice exhibited significant reduction in thymus size and thymocyte numbers.** (A) Representative images of thymuses from tumor-bearing WT and *Fstl1*<sup>+/-</sup> mice. Scale bar, 5 mm. (B, C) Thymus weight and index of tumor-bearing WT and *Fstl1*<sup>+/-</sup> mice (n=8, WT; n=9, *Fstl1*<sup>+/-</sup>). (D) Total thymocyte numbers were counted from tumor-bearing WT and *Fstl1*<sup>+/-</sup> mice (n=8, WT; n=9, *Fstl1*<sup>+/-</sup>). (E) Representative flow cytometry profiles presenting the proportions of DN, DP, CD4<sup>+</sup> SP and CD8<sup>+</sup> SP thymocytes from the thymuses of WT and *Fstl1*<sup>+/-</sup> tumor-bearing mice. (F) Quantification of the proportions of DN, DP, CD4<sup>+</sup> SP and CD8<sup>+</sup> SP thymocytes within the gated live cells in the thymuses of WT and *Fstl1*<sup>+/-</sup> tumor-bearing mice (n=8, WT; n=9, *Fstl1*<sup>+/-</sup>). (G) The numbers of DN, DP, CD4<sup>+</sup> SP and CD8<sup>+</sup> SP thymocytes (n=8, WT; n=9, *Fstl1*<sup>+/-</sup>). Data are presented as mean ± SD. Each dot in the graphs represents an individual mouse. n.s., not significant; \*p < 0.05, \*\*p < 0.01.
